# Supplementary material for: Genome-wide functional analysis reveals that autophagy is necessary for growth, sporulation, deoxynivalenol production and virulence in Fusarium graminearum
Source: PubMed Central journal article supplement (PMC5594004; doi:10.1038/s41598-017-11640-z), 2017-09-11
Supplement: 41598_2017_11640_MOESM1_ESM.pdf [file 41598_2017_11640_MOESM1_ESM.pdf]

1 **Genome-wide functional analysis reveals that autophagy is**  
2 **necessary for growth, sporulation, deoxynivalenol production**  
3 **and virulence in *Fusarium graminearum***

4

5 Wuyun Lv<sup>1</sup>, Chunyan Wang<sup>1</sup>, Nan Yang<sup>1</sup>, Yawei Que<sup>1</sup>, Nicholas J. Talbot<sup>2</sup> and Zhengyi Wang<sup>1\*</sup>

6

7 <sup>1</sup>State Key Laboratory for Rice Biology, Institute of Biotechnology, Zhejiang University,

8 Hangzhou 310029, China

9 <sup>2</sup>School of Biosciences, University of Exeter, Geoffrey Pope Building, Exeter EX4 4QD, United

10 Kingdom

11

12

13

14

15

16

17

18

19

20

21

22 \*Corresponding author: Zhengyi Wang; E-mail: [zhywang@zju.edu.cn](mailto:zhywang@zju.edu.cn)

23 **Supporting information**

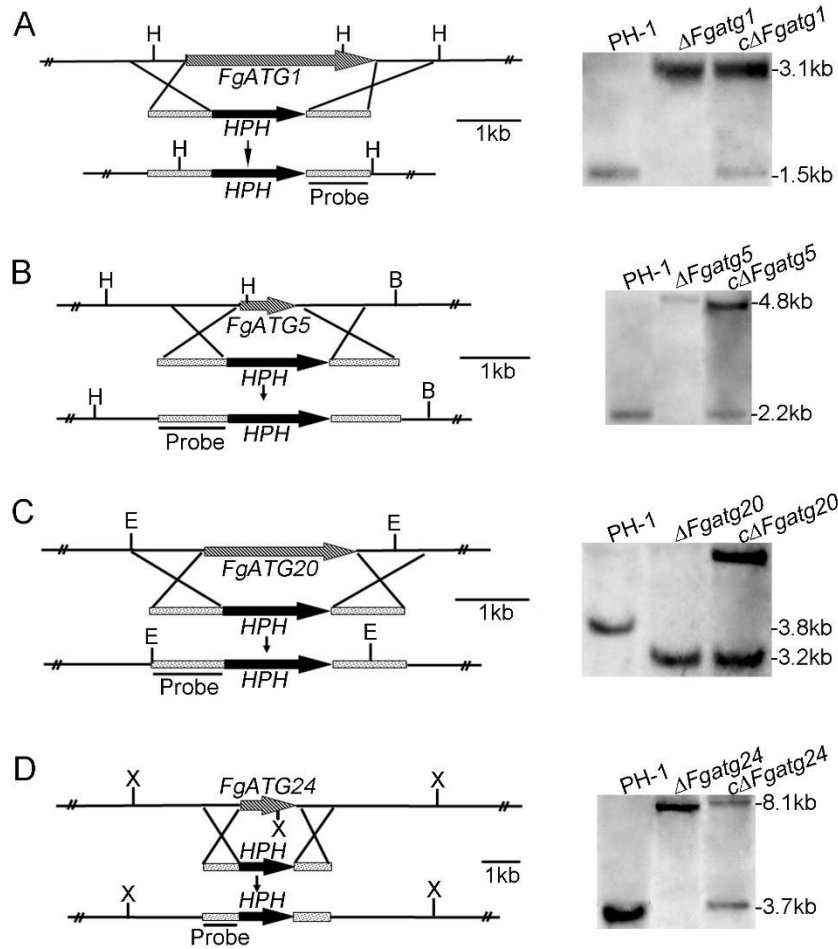

Figure S1

24

25 **Figure S1. Targeted gene replacements of *FgATG1*, *FgATG5*, *FgATG20* and *FgATG24*.** (A)

26 Construction of the DNA fragment for *FgATG1* knockout and Southern blot analysis. Genomic

27 DNAs of the wild-type PH-1,  $\Delta Fgatg1$  mutant and the complemented strain  $c\Delta Fgatg1$  were

28 digested with *Hind* III and probed with a ~1.0kb fragment amplified with the primers 1-PF and

29 1-PR. H=*Hind* III. (B) Construction of the DNA fragment for *FgATG5* knockout and Southern

30 blot analysis. Genomic DNAs of PH-1,  $\Delta Fgatg5$  mutant and the complemented strain  $c\Delta Fgatg5$

31 were digested with *Hind* III and *Bam*H I and probed with a ~1.0kb fragment amplified with the

32 primers 5-PF and 5-PR. H=*Hind* III; B=*Bam*H I . (C) Construction of the DNA fragment for  
33 *FgATG20* knockout and Southern blot analysis. Genomic DNAs of PH-1,  $\Delta Fgatg20$  mutant and  
34 the complemented strain  $c\Delta Fgatg20$  were digested with *Eco*R I and probed with a ~1.0kb  
35 fragment amplified with the primers 20-PF and 20-PR. E=*Eco*R I . (D) Construction of the DNA  
36 fragment for *FgATG24* knockout and Southern blot analysis. Genomic DNAs of PH-1,  $\Delta Fgatg24$   
37 mutant and the complemented strain  $c\Delta Fgatg24$  were digested with *Xba* I and probed with a  
38 ~1.0kb fragment amplified with the primers 24-PF and 24-PR. X=*Xba* I . The complementation of  
39 the  $\Delta Fgatg1$ ,  $\Delta Fgatg5$ ,  $\Delta Fgatg20$  and  $\Delta Fgatg24$  mutants was performed by re-introduction of  
40 *FgATG1*, *FgATG5*, *FgATG20* and *FgATG24* genes under their own promoters and terminators,  
41 respectively.

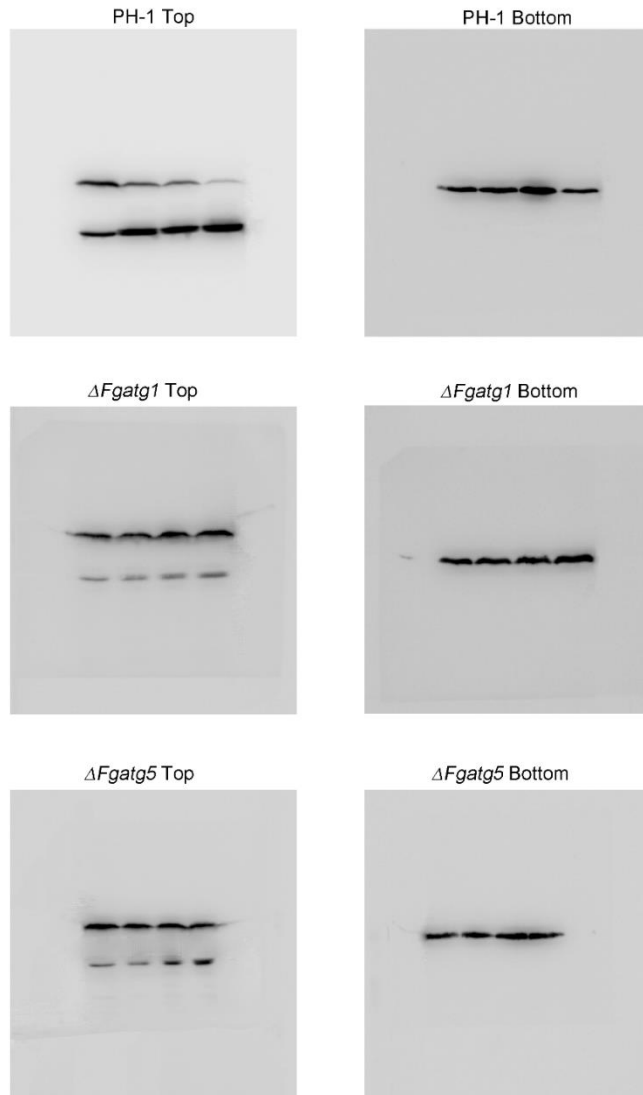

Figure S2

42

43 **Figure S2. The original full-length blots of Figure 7D.** GFP-FgAtg8 proteolysis assays of PH-1,

44  $\Delta Fgatg1$  and  $\Delta Fgatg5$ . Mycelia were harvested from liquid CM cultures after incubation in a 180

45 rpm-shaker in at 25°C for 24 h. Autophagy was induced after nitrogen starvation for 4 h in MM-N

46 liquid medium with 2 mM PMSF. Mycelia were collected at 0, 4, 8 and 12 h respectively and total

47 proteins were extracted for the analysis of Western blotting by anti-GFP. Anti-GAPDH was shown

48 as a control (see Figure 7D).

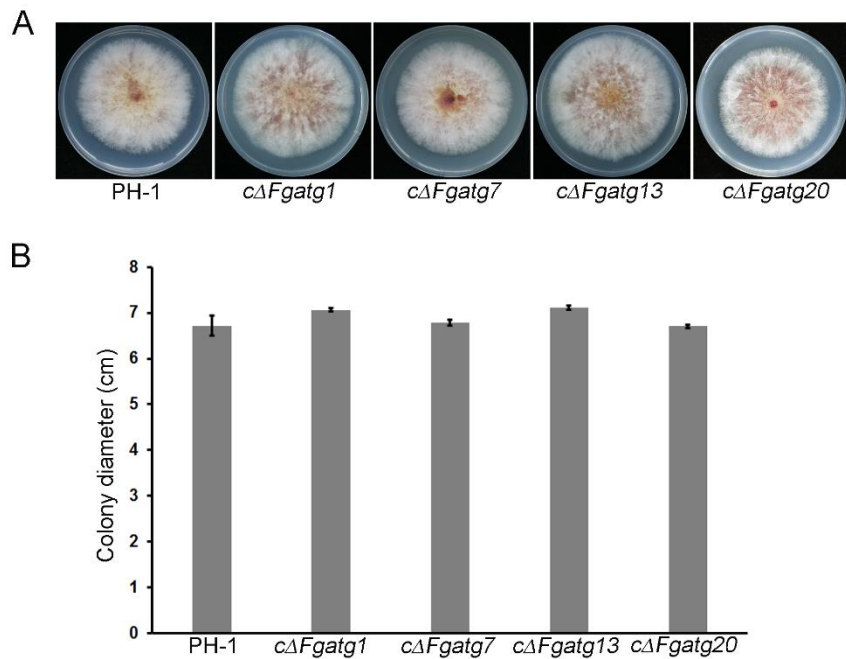

Figure S3

49

50 **Figure S3. The defects in vegetative growth of the deletion mutants could be complemented**

51 **by re-introduction of the corresponding *ATG* genes.** (A) Colonies of wild-type PH-1 and the

52 complemented strains *cΔFgat1*, *cΔFgat7*, *cΔFgat13* and *cΔFgat20*. Photographs were taken

53 after incubation on PDA plates at 25°C for 3 days. (B) Bar chart showing colony diameters of

54 PH-1 and the complemented strains *cΔFgat1*, *cΔFgat7*, *cΔFgat13* and *cΔFgat20*. Linear bars

55 in each column denote standard errors of three experiments.

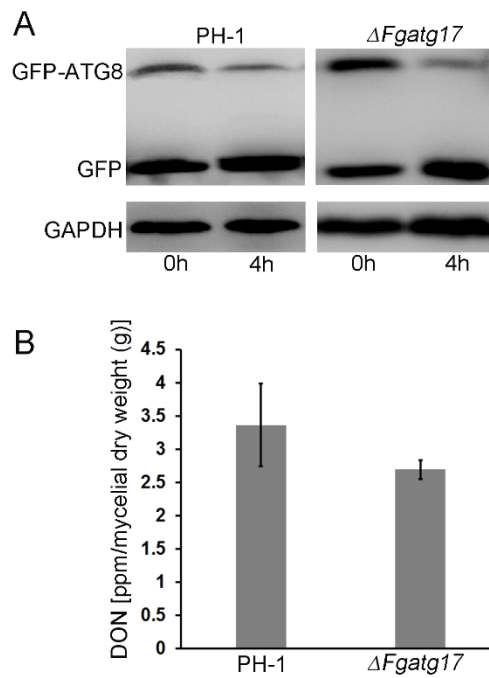

Figure S4

56

57 **Figure S4. The *FgATG17* role in the autophagy and DON production of *F. graminearum*.** (A)

58 GFP-FgAtg8 proteolysis assays of PH-1 and  $\Delta Fgatg17$ . Mycelia were harvested from liquid CM

59 cultures after incubation for 24 h and from MM-N liquid medium with 2 mM PMSF for 4 h in a

60 180 rpm-shaker in at 25°C. Total proteins were extracted for the analysis of Western blotting by

61 anti-GFP. Anti-GAPDH was shown as a control. (B) DON production in PH-1 and  $\Delta Fgatg17$ .

62 There was no significant difference in level of DON production between PH-1 and  $\Delta Fgatg17$

63 mutant. Methods Enzyme-linked immunosorbent assay (ELISA) was used to determine the level

64 of DON production of in PH-1 and  $\Delta Fgatg17$ . Filter liquor containing DON was got from the 25

65 mL TBI liquid medium with five 5-mm mycelial plugs after incubation at 28°C for 4 days in a

66 150 rpm shaker. Linear bars in each column denote standard errors of three repeats.

67

68 **Table S1.** Autophagy-related genes in *Fusarium graminearum*

| Yeast     |                 |                                                                                                                                                                      | <i>Fusarium graminearum</i> |
|-----------|-----------------|----------------------------------------------------------------------------------------------------------------------------------------------------------------------|-----------------------------|
| Gene name | Systematic name | Function                                                                                                                                                             | Gene                        |
| ATG1      | YGL180W         | Protein serine/threonine kinase; required for vesicle formation in autophagy and the cytoplasm-to-vacuole targeting (Cvt) pathway                                    | FGSG_05547                  |
| ATG2      | YNL242W         | Peripheral membrane protein required for autophagic vesicle formation; involved in Atg9p cycling between the phagophore assembly site and mitochondria               | FGSG_10283                  |
| ATG3      | YNR007C         | E2-like enzyme; involved in autophagy and the Cvt pathway; plays a role in formation of Atg8p-phosphatidylethanolamine conjugates                                    | FGSG_08900                  |
| ATG4      | YNL223W         | Conserved cysteine protease required for autophagy; cleaves Atg8p to a form required for autophagosome and Cvt vesicle generation                                    | FGSG_09858                  |
| ATG5      | YPL149W         | Undergoes conjugation with Atg12p to form a complex involved in Atg8p lipidation                                                                                     | FGSG_10053                  |
| ATG6      | YPL120W         | Subunit of phosphatidylinositol (PtdIns) 3-kinase complexes I and II                                                                                                 | FGSG_11805                  |
| ATG7      | YHR171W         | Mediates the attachment of Atg12p to Atg5p and Atg8p to phosphatidylethanolamine                                                                                     | FGSG_10226                  |
| ATG8      | YBL078C         | Component of autophagosomes and Cvt vesicles; unique ubiquitin-like protein conjugated to PE involved in phagophore expansion                                        | FGSG_10740                  |
| ATG9      | YDL149W         | Transmembrane protein involved in forming Cvt and autophagic vesicles; cycles between the phagophore assembly site (PAS) and other cytosolic punctate structures     | FGSG_13660                  |
| ATG10     | YLL042C         | Conserved E2-like conjugating enzyme; mediates formation of the Atg12p-Atg5p conjugate                                                                               | FGSG_00611                  |
| ATG11     | YPR049C         | Required for delivery of aminopeptidase I to the vacuole in Cvt pathway; involved in pexophagy and mitophagy                                                         | FGSG_00382                  |
| ATG12     | YBR217W         | Ubiquitin-like modifier involved in autophagy and the Cvt pathway; conjugated to Atg5p to form a complex involved in Atg8p lipidation                                | FGSG_13550                  |
| ATG13     | YPR185W         | Regulatory subunit of the Atg1p signaling complex; stimulates Atg1p kinase activity                                                                                  | FGSG_08491                  |
| ATG14     | YBR128C         | Autophagy-specific subunit of phosphatidylinositol 3-kinase complex I                                                                                                | FGSG_00675 <sup>a</sup>     |
| ATG15     | YCR068W         | Lipase required for intravacuolar lysis of autophagic and Cvt bodies                                                                                                 | FGSG_02519                  |
| ATG16     | YMR159C         | Interacts with Atg12p-Atg5p conjugates to form Atg12p-Atg5p-Atg16p multimers                                                                                         | FGSG_02566                  |
| ATG17     | YLR423C         | Scaffold protein responsible for phagophore assembly site organization; regulatory subunit of an autophagy-specific complex that includes Atg1p and Atg13p           | FGSG_06510                  |
| ATG18     | YFR021W         | Phosphoinositide binding protein; required for vesicle formation in autophagy and the Cvt pathway                                                                    | FGSG_04297                  |
| ATG19     | YOL082W         | Receptor protein for the Cvt pathway; delivers cargo proteins aminopeptidase I and alpha-mannosidase to the phagophore assembly site for packaging into Cvt vesicles | No homolog found            |

|                    |                  |                                                                                                                       |                           |
|--------------------|------------------|-----------------------------------------------------------------------------------------------------------------------|---------------------------|
| ATG20              | YDL113C          | Sorting nexin family member; required for the Cvt pathway and for endosomal sorting                                   | FGSG_06950                |
| ATG21              | YPL100W          | Phosphoinositide binding protein; required for vesicle formation in the Cvt pathway                                   | No homolog found          |
| ATG22              | YCL038C          | Vacuolar integral membrane protein required for efflux of amino acids during autophagic body breakdown in the vacuole | FGSG_01225                |
| ATG23              | YLR431C          | Peripheral membrane protein required for autophagy and the Cvt pathway                                                | FGSG_02793 <sup>a</sup>   |
| ATG24              | YJL036W          | Sorting nexin; involved in the Cvt pathway; forms complexes with Snx41p and with Atg20p                               | FGSG_09157                |
| ATG26              | YLR189C          | UDP-glucose:sterol glucosyltransferase                                                                                | FGSG_13231                |
| ATG27              | YJL178C          | Type I membrane protein involved in autophagy and the Cvt pathway                                                     | FGSG_01574 <sup>a</sup>   |
| ATG28              | XP_001821<br>228 | Involved in pexophagy                                                                                                 | FGSG_07526 <sup>a,b</sup> |
| ATG29              | YPL166W          | Required for recruiting other ATG proteins to the pre-autophagosomal structure (PAS); interacts with Atg17p           | FGSG_13575 <sup>a</sup>   |
| ATG30 <sup>c</sup> | CCA39286         | Pexophagy receptor                                                                                                    | No homolog found          |
| ATG31              | YDR022C          | Forms a complex with Atg17p and Atg29p that localizes other proteins to the pre-autophagosomal structure              | No homolog found          |
| ATG32              | YIL146C          | Mitophagy protein                                                                                                     | No homolog found          |
| ATG33              | YLR356W          | Required for mitophagy                                                                                                | FGSG_00549 <sup>a</sup>   |
| ATG34              | YOL083W          | Receptor protein involved in the transport of Ams1p                                                                   | No homolog found          |
| ATG35 <sup>c</sup> | C4QVX6           | A micropexophagy-specific protein                                                                                     | No homolog found          |
| ATG36              | YJL185C          | Pexophagy receptor, interacts with Pex3p                                                                              | No homolog found          |
| ATG37              | C4R8D7           | Involved in pexophagy                                                                                                 | FGSG_05200                |
| ATG38              | YLR211C          | Homodimeric subunit of autophagy-specific PtdIns-3-kinase complex I                                                   | No homolog found          |
| ATG39              | YLR312C          | Autophagy receptor with a role in degradation of the ER and nucleus                                                   | No homolog found          |
| ATG40              | YOR152C          | Involved specifically in autophagy of cortical and cytoplasmic ER                                                     | No homolog found          |
| ATG41              | YPL250C          | Involved in autophagosome formation                                                                                   | No homolog found          |

69 The systematic names of *S. cerevisiae* genes and their functions were obtained from the National Center for  
70 Biotechnology Information database (<http://www.ncbi.nlm.nih.gov/>). Most homologs of *F. graminearum* were  
71 identified by BLAST searching with ATG genes in *S. cerevisiae*, but some were identified by the comparison to the  
72 ATGs in *Magnaporthe oryzae*<sup>a</sup>, *Aspergillus oryzae*<sup>b</sup> and *Pichia pastoris*<sup>c</sup>, respectively. ATG30 and ATG35 have  
73 been previously described in *P. pastoris* but not in *S. cerevisiae*.

74



75 **Table S2. PCR primers used in this study.**

| Primer | Sequence (5'-3')                               | Relevant characteristics                                                                       |
|--------|------------------------------------------------|------------------------------------------------------------------------------------------------|
| 1-UF   | GCAGCCATGTACCAGCAT                             | Amplification of upstream fragment of <i>FgATG1</i> for the construction of deletion mutants   |
| 1-UR   | <u>TCCACTAGCTCCAGCCAAGGGCATGTAAACGGAGGAC</u>   |                                                                                                |
| 1-DF   | <u>AGTAGATGCCGACCGAACAAAGCCCAGGAGGCGGATTT</u>  | Amplification of downstream fragment of <i>FgATG1</i> for the construction of deletion mutants |
| 1-DR   | TCCCGCACGGTGTTAGAT                             |                                                                                                |
| 1-NF   | CTCTTCTGCCTGTAGTGC                             | Amplification of the final products using for the <i>FgATG1</i> gene deletion                  |
| 1-NR   | CACGAAGAACAAAGACGA                             |                                                                                                |
| 1-YF   | CTTTACAGCGAAATCCAA                             | For identification of <i>FgATG1</i> gene deletion transformants                                |
| 1-YR   | GGGAAGTAGAGGGAAGCA                             |                                                                                                |
| 1-PF   | GGGGTTTGGCTTGCGACTC                            | Amplification of <i>FgATG1</i> probe using for Southern blot analysis                          |
| 1-PR   | TCCCGCACGGTGTTAGAT                             |                                                                                                |
| 2-UF   | GTTGCCAATGAGTTGAGTC                            | Amplification of upstream fragment of <i>FgATG2</i> for the construction of deletion mutants   |
| 2-UR   | <u>TCCACTAGCTCCAGCCAAGAAGGGCATGTTTAGAAGAA</u>  |                                                                                                |
| 2-DF   | <u>AGTAGATGCCGACCGAACACTGGATGGGACAGCAAGA</u>   | Amplification of downstream fragment of <i>FgATG2</i> for the construction of deletion mutants |
| 2-DR   | ACATCGCAACTCAACG                               |                                                                                                |
| 2-NF   | CTTCTGTCCGTCGCTCAA                             | Amplification of the final products using for the <i>FgATG2</i> gene deletion                  |
| 2-NR   | TACAATGCGCTCAAGACG                             |                                                                                                |
| 2-YF   | AATCCAAGCCGAGTCGTT                             | For identification of <i>FgATG2</i> gene deletion transformants                                |
| 2-YR   | GTTTGCCCTCCTTGTGAA                             |                                                                                                |
| 3-UF   | CTCGGCGACCGTAGCGTA                             | Amplification of upstream fragment of <i>FgATG3</i> for the construction of deletion mutants   |
| 3-UR   | <u>TCCACTAGCTCCAGCCAAGAAGGGTGCGGGTGTGTTA</u>   |                                                                                                |
| 3-DF   | <u>AGTAGATGCCGACCGAACACACATGCCACCAGAAAACAC</u> | Amplification of downstream fragment of <i>FgATG3</i> for the construction of deletion mutants |
| 3-DR   | CCAGACACCAAACGGAACA                            |                                                                                                |
| 3-NF   | CGACAAGGAATGGGAGGA                             | Amplification of the final products using for the <i>FgATG3</i> gene deletion                  |
| 3-NR   | TGCGTGCCAGAGTCAGCT                             |                                                                                                |

---

|      |                                                  |                                     |
|------|--------------------------------------------------|-------------------------------------|
| 3-YF | CAACCTTCCGCCAGACCG                               | For identification of <i>FgATG3</i> |
| 3-YR | GCGAGATAGCCTGACAGATACA                           | gene deletion transformants         |
| 4-UF | TTGATTCGCTCCGTCCAT                               | Amplification of upstream           |
| 4-UR | <u>TCCACTAGCTCCAGCCAAGGGTAACAGGCAAGGCAGAC</u>    | fragment of <i>FgATG4</i> for the   |
|      |                                                  | construction of deletion            |
|      |                                                  | mutants                             |
| 4-DF | <u>AGTAGATGCCGACCGAACAGGCTAAGGATAAGAAGCGACC</u>  | Amplification of downstream         |
| 4-DR | GTCTGACGAAAATGGAGTGG                             | fragment of <i>FgATG4</i> for the   |
|      |                                                  | construction of deletion            |
|      |                                                  | mutants                             |
| 4-NF | TCAACGGGGTGGTAAACG                               | Amplification of the final          |
| 4-NR | GCCAGCAAATACAAGTCGG                              | products using for the              |
|      |                                                  | <i>FgATG4</i> gene deletion         |
| 4-YF | CACAGCTCAACCGCCTAAT                              | For identification of <i>FgATG4</i> |
| 4-YR | CGTGGGAGTTTGTCAATGCT                             | gene deletion transformants         |
| 5-UF | CGCAAGCCAAGGACCATC                               | Amplification of upstream           |
| 5-UR | <u>TCCACTAGCTCCAGCCAAGAGTGAGGCAAGGCGTGATA</u>    | fragment of <i>FgATG5</i> for the   |
|      |                                                  | construction of deletion            |
|      |                                                  | mutants                             |
| 5-DF | <u>AGTAGATGCCGACCGAACACCTCCTCCTCGGCGATAT</u>     | Amplification of downstream         |
| 5-DR | TGGGTCTGCGATACAAGCT                              | fragment of <i>FgATG5</i> for the   |
|      |                                                  | construction of deletion            |
|      |                                                  | mutants                             |
| 5-NF | CTACCCTTGAGCCTCTTACATC                           | Amplification of the final          |
| 5-NR | CGAGCATATCCTTGTGAGTGG                            | products using for the              |
|      |                                                  | <i>FgATG5</i> gene deletion         |
| 5-YF | CACCGACGACTCCTTTCAT                              | For identification of <i>FgATG5</i> |
| 5-YR | GGTTTGCGTTGCCATTTC                               | gene deletion transformants         |
| 5-PF | TTCGCCTTTCATGTTCCC                               | Amplification of <i>FgATG5</i>      |
| 5-PR | ATTCGCTGCCGTTAGAGC                               | probe using for Southern blot       |
|      |                                                  | analysis                            |
| 6-UF | CCTGTTGCCATGTTCGATTTTC                           | Amplification of upstream           |
| 6-UR | <u>TCCACTAGCTCCAGCCAAGGCCTTAGCGGTGACGTTGT</u>    | fragment of <i>FgATG6</i> for the   |
|      |                                                  | construction of deletion            |
|      |                                                  | mutants                             |
| 6-DF | <u>AGTAGATGCCGACCGAACACATTAGGGGTAGTAGACTTGCG</u> | Amplification of downstream         |
| 6-DR | AACGGTTCCTGGGTTGCT                               | fragment of <i>FgATG6</i> for the   |
|      |                                                  | construction of deletion            |
|      |                                                  | mutants                             |
| 6-NF | GCATTCACCCGCTTTAGT                               | Amplification of the final          |
| 6-NR | CTGGGTACTGGTGAGGT                                | products using for the              |
|      |                                                  | <i>FgATG6</i> gene deletion         |

---

---

|      |                                                  |                                                                                                |
|------|--------------------------------------------------|------------------------------------------------------------------------------------------------|
| 6-YF | AGTTATCCGCATCATGTCTCG                            | For identification of <i>FgATG6</i> gene deletion transformants                                |
| 6-YR | CCTGTCCATTTGCTTCC                                |                                                                                                |
| 7-UF | GTTTGTGTTGTGAGGACGGG                             |                                                                                                |
| 7-UR | <u>TCCACTAGCTCCAGCCAAGCTGCTCGGGGTTGAATGT</u>     |                                                                                                |
| 7-DF | <u>AGTAGATGCCGACCGAACACGTTGCTGGGTTTACTTTGC</u>   | Amplification of downstream fragment of <i>FgATG7</i> for the construction of deletion mutants |
| 7-DR | TATCGTGCGTTGCGTTTC                               |                                                                                                |
| 7-NF | ATGCTGCCGGAAGTGTATC                              | Amplification of the final products using for the <i>FgATG7</i> gene deletion                  |
| 7-NR | CAGCCTTTCGCAGTATCTTC                             |                                                                                                |
| 7-YF | TTCACTGACCCTTCGACATAACC                          | For identification of <i>FgATG7</i> gene deletion transformants                                |
| 7-YR | CCCAACGCAGCATTCATAAC                             |                                                                                                |
| 8-UF | AAGGAGCGTGTCTAGGGTGG                             | Amplification of upstream fragment of <i>FgATG8</i> for the construction of deletion mutants   |
| 8-UR | <u>TCCACTAGCTCCAGCCAAGCCAGAGTTCATCGACGAGTTTC</u> |                                                                                                |
| 8-DF | <u>AGTAGATGCCGACCGAACATCACGAACGCCCGAACAA</u>     |                                                                                                |
| 8-DR | CCAAAATCCCCTCCAAAAGC                             |                                                                                                |
| 8-NF | AGGTTTCCTGGTAGCGAGTG                             | Amplification of the final products using for the <i>FgATG8</i> gene deletion                  |
| 8-NR | GGTCAACAAGGCTCATTCG                              |                                                                                                |
| 8-YF | CTTACCGCCTCCACAACAA                              | For identification of <i>FgATG8</i> gene deletion transformants                                |
| 8-YR | CTATGTGACAACGCCAACG                              |                                                                                                |
| 9-UF | CGTTAGGGGCGTGAGACC                               | Amplification of upstream fragment of <i>FgATG9</i> for the construction of deletion mutants   |
| 9-UR | <u>TCCACTAGCTCCAGCCAAGGTGCGGAAGAATGACAAGG</u>    |                                                                                                |
| 9-DF | <u>AGTAGATGCCGACCGAACATCCCCTAATACCATGCC</u>      |                                                                                                |
| 9-DR | CACGCACTTACTGTAAAGCACC                           |                                                                                                |
| 9-NF | GGAGGTTGTGGGTGGTTATC                             | Amplification of the final products using for the <i>FgATG9</i> gene deletion                  |
| 9-NR | CCAGGGCAAAGGCTGTTA                               |                                                                                                |
| 9-YF | ACCCGAGGGAGAAAGCAC                               | For identification of <i>FgATG9</i> gene deletion transformants                                |
| 9-YR | GCTGTCTCAACTTCTGGCTCA                            |                                                                                                |

---

---

|       |                                                  |                                    |
|-------|--------------------------------------------------|------------------------------------|
| 10-UF | CGAAGGAGGTATGGGGAGC                              | Amplification of upstream          |
| 10-UR | <u>TCCACTAGCTCCAGCCAAGCGAGCAGTATTGAAGTCGTGGT</u> | fragment of <i>FgATG10</i> for the |
|       |                                                  | construction of deletion           |
|       |                                                  | mutants                            |
| 10-DF | <u>AGTAGATGCCGACCGAACAGCCTAACTAACACCTTGCTCAC</u> | Amplification of downstream        |
| 10-DR | CCGCTTTGTACTTGCTCTTC                             | fragment of <i>FgATG10</i> for the |
|       |                                                  | construction of deletion           |
|       |                                                  | mutants                            |
| 10-NF | CGGAATAAGGATAGAAGGCACG                           | Amplification of the final         |
| 10-NR | TGCTGGATGTTGTCGCTCT                              | products using for the             |
|       |                                                  | <i>FgATG10</i> gene deletion       |
| 10-YF | CCGACTTTTCTTATGGTGGAGG                           | For identification of              |
| 10-YR | CATCAGCGGGTAGGTTGC                               | <i>FgATG10</i> gene deletion       |
|       |                                                  | transformants                      |
| 11-UF | CGCCGCTACCAACTATTA                               | Amplification of upstream          |
| 11-UR | <u>TCCACTAGCTCCAGCCAAGGATTGACCGCCACAGATA</u>     | fragment of <i>FgATG11</i> for the |
|       |                                                  | construction of deletion           |
|       |                                                  | mutants                            |
| 11-DF | <u>AGTAGATGCCGACCGAACATGGGATTCTTTGTGGAGT</u>     | Amplification of downstream        |
| 11-DR | AAATCGCTTAGGCAACTC                               | fragment of <i>FgATG11</i> for the |
|       |                                                  | construction of deletion           |
|       |                                                  | mutants                            |
| 11-NF | TCGTCAACGCCTTCCATA                               | Amplification of the final         |
|       |                                                  | products using for the             |
| 11-NR | TCTTCTCGGCTGGTCCCT                               | <i>FgATG11</i> gene deletion       |
| 11-YF | ACGAATTACATACAGAGGT                              | For identification of              |
| 11-YR | ATTTCCCGTCCAGTCATA                               | <i>FgATG11</i> gene deletion       |
|       |                                                  | transformants                      |
| 12-UF | GCACCTGTTACGCAATAT                               | Amplification of upstream          |
| 12-UR | <u>TCCACTAGCTCCAGCCAAGGCAGAAGCCGTCCTCTTA</u>     | fragment of <i>FgATG12</i> for the |
|       |                                                  | construction of deletion           |
|       |                                                  | mutants                            |
| 12-DF | <u>AGTAGATGCCGACCGAACATTTGCGATGATGGAAAGT</u>     | Amplification of downstream        |
| 12-DR | TTGTCGGTGATAGTCTTGC                              | fragment of <i>FgATG12</i> for the |
|       |                                                  | construction of deletion           |
|       |                                                  | mutants                            |
| 12-NF | CGATGTCCAGTCTCGCAGTA                             | Amplification of the final         |
| 12-NR | GTTGCCCTTGGTATGGAA                               | products using for the             |
|       |                                                  | <i>FgATG12</i> gene deletion       |
| 12-YF | CTGCCTACCAATGCCTCT                               | For identification of              |
| 12-YR | CATCTTGGGCCAACAACG                               | <i>FgATG12</i> gene deletion       |
|       |                                                  | transformants                      |

---

---

|       |                                                  |                                    |
|-------|--------------------------------------------------|------------------------------------|
| 13-UF | GAGGTCCTGAGTGGTGAC                               | Amplification of upstream          |
| 13-UR | <u>TCCACTAGCTCCAGCCAAGAGATTTTCGACGGTCTTATC</u>   | fragment of <i>FgATG13</i> for the |
|       |                                                  | construction of deletion           |
|       |                                                  | mutants                            |
| 13-DF | <u>AGTAGATGCCGACCGAACAGCAGCGAACAGTGGACAG</u>     | Amplification of downstream        |
| 13-DR | GTTAGGCAGGCTGGGTTA                               | fragment of <i>FgATG13</i> for the |
|       |                                                  | construction of deletion           |
|       |                                                  | mutants                            |
| 13-NF | GGCTCAAACGAAACAATC                               | Amplification of the final         |
| 13-NR | AGCGATCAACTTAACTGC                               | products using for the             |
|       |                                                  | <i>FgATG13</i> gene deletion       |
| 13-YF | TGATACAATCCCATTACAG                              | For identification of              |
| 13-YR | GCTCAACTTGCCACCTCT                               | <i>FgATG13</i> gene deletion       |
|       |                                                  | transformants                      |
| 14-UF | GGCTGCCCAGACTTTGAA                               | Amplification of upstream          |
| 14-UR | <u>TCCACTAGCTCCAGCCAAGCACTTGGTGCGAAGTAGTTGTC</u> | fragment of <i>FgATG14</i> for the |
|       |                                                  | construction of deletion           |
|       |                                                  | mutants                            |
| 14-DF | <u>AGTAGATGCCGACCGAACAGGGTCCTTCCTTGACAAATC</u>   | Amplification of downstream        |
| 14-DR | AATCCCAGCCAACCTCTTC                              | fragment of <i>FgATG14</i> for the |
|       |                                                  | construction of deletion           |
|       |                                                  | mutants                            |
| 14-NF | CAGTCAAACGGCTCAAGAAC                             | Amplification of the final         |
| 14-NR | CGCCCGTCACTCCTCAAC                               | products using for the             |
|       |                                                  | <i>FgATG14</i> gene deletion       |
| 14-YF | CGCTGCTGTATCTGATGGTC                             | For identification of              |
| 14-YR | GGGGATAGTCTCGATGAGGG                             | <i>FgATG14</i> gene deletion       |
|       |                                                  | transformants                      |
| 15-UF | TGGAGAACTCAGCCTTGC                               | Amplification of upstream          |
| 15-UR | <u>TCCACTAGCTCCAGCCAAGGTACCTGGCACCTACAAAT</u>    | fragment of <i>FgATG15</i> for the |
|       |                                                  | construction of deletion           |
|       |                                                  | mutants                            |
| 15-DF | <u>AGTAGATGCCGACCGAACACAGGTAGCCCTGGAGCAT</u>     | Amplification of downstream        |
| 15-DR | CGATTTCGGACTTTCTTGC                              | fragment of <i>FgATG15</i> for the |
|       |                                                  | construction of deletion           |
|       |                                                  | mutants                            |
| 15-NF | ATGTTATTGTGATCGAGGGT                             | Amplification of the final         |
| 15-NR | GACGCTCCTTTGCCTGCT                               | products using for the             |
|       |                                                  | <i>FgATG15</i> gene deletion       |
| 15-YF | GTCACTATCACGCAGCAAT                              | For identification of              |
| 15-YR | ATCAGCTAAACGGTGGATT                              | <i>FgATG15</i> gene deletion       |
|       |                                                  | transformants                      |

---

---

|       |                                                |                                                                                                 |
|-------|------------------------------------------------|-------------------------------------------------------------------------------------------------|
| 16-UF | AAAATAGTTGGCAGACATAC                           | Amplification of upstream fragment of <i>FgATG16</i> for the construction of deletion mutants   |
| 16-UR | <u>TCCACTAGCTCCAGCCAAGCAACCTCCACTTGTATCG</u>   |                                                                                                 |
| 16-DF | <u>AGTAGATGCCGACCGAACAAAGTCTAAGGAACAACGCTC</u> | Amplification of downstream fragment of <i>FgATG16</i> for the construction of deletion mutants |
| 16-DR | GCATCCAACAGAAACATC                             |                                                                                                 |
| 16-NF | CGCCACAGTGCTAAGAGG                             | Amplification of the final products using for the <i>FgATG16</i> gene deletion                  |
| 16-NR | CTTCTACACCCATTCATCTC                           |                                                                                                 |
| 16-YF | CATTATGCGACATCATCC                             |                                                                                                 |
| 16-YR | GTTTCTCAGCGACACCTT                             | For identification of <i>FgATG16</i> gene deletion transformants                                |
| 17-UF | TTCAACGCCTACCATTCG                             | Amplification of upstream fragment of <i>FgATG17</i> for the construction of deletion mutants   |
| 17-UR | <u>TCCACTAGCTCCAGCCAAGCGGCTCCACTTCCTTCTA</u>   |                                                                                                 |
| 17-DF | <u>AGTAGATGCCGACCGAACAAACGATTGATAGCGAGGGT</u>  | Amplification of downstream fragment of <i>FgATG17</i> for the construction of deletion mutants |
| 17-DR | CTGCTTGCTGGGTCTTTT                             |                                                                                                 |
| 17-NF | GAGCGTATTAGACAAGATTC                           | Amplification of the final products using for the <i>FgATG17</i> gene deletion                  |
| 17-NR | CCTTCTCGCTACCTCTA                              |                                                                                                 |
| 17-YF | CGAAGCCTTCTTGACTTTAT                           |                                                                                                 |
| 17-YR | CGTTGCCTTGGGTCTGTG                             | For identification of <i>FgATG17</i> gene deletion transformants                                |
| 18-UF | GCCTCATTTATTTCTGCT                             | Amplification of upstream fragment of <i>FgATG18</i> for the construction of deletion mutants   |
| 18-UR | <u>TCCACTAGCTCCAGCCAAGCTGATTTGAAGCGTATGTTA</u> |                                                                                                 |
| 18-DF | <u>AGTAGATGCCGACCGAACACGTTTATCGGATTGGGTTTA</u> | Amplification of downstream fragment of <i>FgATG18</i> for the construction of deletion mutants |
| 18-DR | TCATCTTCGCTTTGCCTA                             |                                                                                                 |
| 18-NF | TAGCAGGCAGGGACTCAG                             | Amplification of the final products using for the <i>FgATG18</i> gene deletion                  |
| 18-NR | TACTCCCGTTGAAGCGAC                             |                                                                                                 |
| 18-YF | GGGACTAATTGCGTTCT                              |                                                                                                 |
| 18-YR | ACAGTTCTCGGAGGATGG                             | For identification of <i>FgATG18</i> gene deletion transformants                                |

---

---

|       |                                               |                                                                                                 |
|-------|-----------------------------------------------|-------------------------------------------------------------------------------------------------|
| 20-UF | TTGCACGTTAAGATAAGC                            | Amplification of upstream fragment of <i>FgATG20</i> for the construction of deletion mutants   |
| 20-UR | <u>TCCACTAGCTCCAGCCAAGGGAGTGATACGAGGATGAA</u> |                                                                                                 |
| 20-DF | <u>AGTAGATGCCGACCGAACATTTGGAGCTTGAAGCAGT</u>  | Amplification of downstream fragment of <i>FgATG20</i> for the construction of deletion mutants |
| 20-DR | GCGATGGAGGTGATAGGC                            |                                                                                                 |
| 20-NF | TGCGTTATCTATCCCTTGA                           | Amplification of the final products using for the <i>FgATG20</i> gene deletion                  |
| 20-NR | GTGCCTTTGTAAGTAGCG                            |                                                                                                 |
| 20-YF | CCGGCCTTGAATGCTAAC                            | For identification of <i>FgATG20</i> gene deletion transformants                                |
| 20-YR | TAGGGTGAAGACGAGTAAGA                          |                                                                                                 |
| 20-PF | TATGCTTGGTCAGGGTATGG                          | Amplification of <i>FgATG20</i> probe using for Southern blot analysis                          |
| 20-PR | TAAGCTGGAACCTGGGAAG                           |                                                                                                 |
| 22-UF | CTCCACTTCCCCTCATTTTC                          | Amplification of upstream fragment of <i>FgATG22</i> for the construction of deletion mutants   |
| 22-UR | <u>TCCACTAGCTCCAGCCAAGGGCAACGCTCAACACCAG</u>  |                                                                                                 |
| 22-DF | <u>AGTAGATGCCGACCGAACAGTGGGAGTCCAGAATGCG</u>  | Amplification of downstream fragment of <i>FgATG22</i> for the construction of deletion mutants |
| 22-DR | GGTCTTGAAGGTGCCTGTTG                          |                                                                                                 |
| 22-NF | GTTTCCTGAATACCCAAGC                           | Amplification of the final products using for the <i>FgATG22</i> gene deletion                  |
| 22-NR | GTGGCGTTCCTGTTCTGC                            |                                                                                                 |
| 22-YF | CAAATATCTCAAAACGGTC                           | For identification of <i>FgATG22</i> gene deletion transformants                                |
| 22-YR | CAATACATTGTCCATCGC                            |                                                                                                 |
| 23-UF | CGCTAAATCAGGGGAGAATG                          | Amplification of upstream fragment of <i>FgATG23</i> for the construction of deletion mutants   |
| 23-UR | <u>TCCACTAGCTCCAGCCAAGTCTTAGGGGACCAAGGGAC</u> |                                                                                                 |
| 23-DF | <u>AGTAGATGCCGACCGAACATTTCCCTCCGCTGCGTTTC</u> | Amplification of downstream fragment of <i>FgATG23</i> for the construction of deletion mutants |
| 23-DR | GAGATACCGGCGTTGTTGAT                          |                                                                                                 |
| 23-NF | CGATGCTCACTCGGCTCT                            | Amplification of the final products using for the <i>FgATG23</i> gene deletion                  |
| 23-NR | CGGCGTTGTTGATGAGGAT                           |                                                                                                 |

---

---

|       |                                                |                                                                                                 |
|-------|------------------------------------------------|-------------------------------------------------------------------------------------------------|
| 23-YF | TGCTACCCCAATTGCCTCC                            | For identification of <i>FgATG23</i> gene deletion transformants                                |
| 23-YR | CGTTAGACTCCTTCGTTTCG                           |                                                                                                 |
| 24-UF | TTATTGAAGATGAGGCAGAG                           | Amplification of upstream fragment of <i>FgATG24</i> for the construction of deletion mutants   |
| 24-UR | <u>TCCACTAGCTCCAGCCAAGAATGCCGCAGTTGTAGGT</u>   |                                                                                                 |
| 24-DF | <u>AGTAGATGCCGACCGAACAGAGGGATGATGGATGACTG</u>  | Amplification of downstream fragment of <i>FgATG24</i> for the construction of deletion mutants |
| 24-DR | GATGACGACCATGACAAAA                            |                                                                                                 |
| 24-NF | GTCCAAGGAGCAGAAGTAG                            | Amplification of the final products using for the <i>FgATG24</i> gene deletion                  |
| 24-NR | TCAAGCACCCAGACCTCC                             |                                                                                                 |
| 24-YF | CGAAGAACCAGGCCATGA                             | For identification of <i>FgATG24</i> gene deletion transformants                                |
| 24-YR | GGACAAGCGGCTGAGGAA                             |                                                                                                 |
| 24-PF | ACGGTCAAGGCTCAGGTG                             | Amplification of <i>FgATG24</i> probe using for Southern blot analysis                          |
| 24-PR | TTGTAGGTTGGAGGAAGTGC                           |                                                                                                 |
| 26-UF | ATGTACGAATACGAGATCC                            | Amplification of upstream fragment of <i>FgATG26</i> for the construction of deletion mutants   |
| 26-UR | <u>TCCACTAGCTCCAGCCAAGGGCAAGATTGAATGGAC</u>    |                                                                                                 |
| 26-DF | <u>AGTAGATGCCGACCGAACATGATTGTTGATTTGGGAATG</u> | Amplification of downstream fragment of <i>FgATG26</i> for the construction of deletion mutants |
| 26-DR | TTTGTTGGACCGACGAGA                             |                                                                                                 |
| 26-NF | CGTCCCATCGTGAAGCAG                             | Amplification of the final products using for the <i>FgATG26</i> gene deletion                  |
| 26-NR | CCATCCTCCTCTGAACCC                             |                                                                                                 |
| 26-YF | CCCCTGAAGAAGTCGCTGAT                           | For identification of <i>FgATG26</i> gene deletion transformants                                |
| 26-YR | CGCCCTTGAGTCGAAACC                             |                                                                                                 |
| 28-UF | CTGGTCTGGTCCCGTCTG                             | Amplification of upstream fragment of <i>FgATG28</i> for the construction of deletion mutants   |
| 28-UR | <u>TCCACTAGCTCCAGCCAAGCGGCGTCGAGTGAGAAAA</u>   |                                                                                                 |
| 28-DF | <u>AGTAGATGCCGACCGAACACGAACGCCTATGTGAAATCC</u> | Amplification of downstream fragment of <i>FgATG28</i> for the construction of deletion mutants |
| 28-DR | CAATTGCCTGGTCCAACAC                            |                                                                                                 |

---



---

|       |                                                           |                                                                                                 |
|-------|-----------------------------------------------------------|-------------------------------------------------------------------------------------------------|
| 28-NF | GGTAGGCTGATGGCGGAGAT                                      | Amplification of the final products using for the <i>FgATG28</i> gene deletion                  |
| 28-NR | GACACGACCGAAAGACAAGA                                      |                                                                                                 |
| 28-YF | AGGTTTGGATCGAATAGCCC                                      | For identification of <i>FgATG28</i> gene deletion transformants                                |
| 28-YR | TCTCGCACCCACCTACGG                                        |                                                                                                 |
| 29-UF | TCACTACCACGCCAAACG                                        | Amplification of upstream fragment of <i>FgATG29</i> for the construction of deletion mutants   |
| 29-UR | <u>TCCACTAGCTCCAGCCAAGCTGTCAACAAGAGTCCACCATC</u>          |                                                                                                 |
| 29-DF | <u>AGTAGATGCCGACCGAACAGTTGCCATTATCCACCCTG</u>             | Amplification of downstream fragment of <i>FgATG29</i> for the construction of deletion mutants |
| 29-DR | CTTGCTGTGCTGCCGTCC                                        |                                                                                                 |
| 29-NF | CGAAGAGCAAAAGCGTGTAG                                      | Amplification of the final products using for the <i>FgATG29</i> gene deletion                  |
| 29-NR | ACTACCCTTAGCCATACCACC                                     |                                                                                                 |
| 29-YF | CACTCCGCTTTATCCTTTCG                                      | For identification of <i>FgATG29</i> gene deletion transformants                                |
| 29-YR | GGGTTTCCGTGACTCTTGT                                       |                                                                                                 |
| 33-UF | CAGTTGGGTTGTCGGATGA                                       | Amplification of upstream fragment of <i>FgATG33</i> for the construction of deletion mutants   |
| 33-UR | <u>TCCACTAGCTCCAGCCAAGTTGTGGCTGTGACCTGTCTG</u>            |                                                                                                 |
| 33-DF | <u>AGTAGATGCCGACCGAACAGAGGAATCCTTCCCTCCC</u>              | Amplification of downstream fragment of <i>FgATG33</i> for the construction of deletion mutants |
| 33-DR | CCCGATAATTCCAACCTCTACC                                    |                                                                                                 |
| 33-NF | GACACCGACTTGTAGGATCAAC                                    | Amplification of the final products using for the <i>FgATG33</i> gene deletion                  |
| 33-NR | TATTCCAAGGGCGACGAA                                        |                                                                                                 |
| 33-YF | CACTTGGCTTGCTGACGG                                        | For identification of <i>FgATG33</i> gene deletion transformants                                |
| 33-YR | CACCCCAAATACCAACGACT                                      |                                                                                                 |
| HPH-F | TATTGAAGGAGCATTTTTGG                                      | Amplification of <i>HPH</i> gene cassette                                                       |
| HPH-R | GCTCTTGTTCCGGTCCGGCATC                                    |                                                                                                 |
| Neo-F | <u>CCACCGCGGTGGCGGCCGCTCTAGAGGAGGTCAACA</u><br>CATCAATGCT | Amplification of the <i>NEO</i> gene                                                            |
| Neo-R | <u>CCCGGGGGATCCACTAGTTCTAGATCAGAAGAATC</u><br>GTCAAGAAG   |                                                                                                 |
| GFP-F | ATGGTGAGCAAGGGCGAGGA                                      | Amplification of the <i>GFP</i> gene cassette                                                   |
| GFP-R | CTTGACAGCTCGTCCATGC                                       |                                                                                                 |

---

---

|        |                                                  |                                                                                                     |
|--------|--------------------------------------------------|-----------------------------------------------------------------------------------------------------|
| Fg8-F  | <u>GCATGGACGAGCTGTACAAGATGCGCAGCAAATTCAAGGA</u>  | Amplification of the full length ORF of <i>FgATG8</i> gene                                          |
| Fg8-R  | <u>CTAAAGGGAACAAAAGCTGGCGGTGTTCTTCTGCTTT</u>     |                                                                                                     |
| Mo1-F  | <u>CCCCCGGGCTGCAGGAATTCGGATTTCAAAGATGGGTTCGC</u> | Amplification of the upstream fragment (native promoter) of <i>MoATG1</i> gene                      |
| Mo1-R  | <u>GACTCCTGTGGGCCCGCCATATGAGCAAGCACAGTTCAAA</u>  |                                                                                                     |
| Fg1-F  | ATGGCGGGCCCACAGGAGTC                             | Amplification of the full length ORF of <i>FgATG1</i> gene                                          |
| Fg1-R  | <u>GGTACCGGGCCCCCCTCGAGTCAGGAAGATGCATGCGAG</u>   |                                                                                                     |
| MF1-YF | AGCCCGCCCTATCCTTAC                               | For identification of complemented transformants of $\Delta Moatg1$ mutants with <i>FgATG1</i> gene |
| MF1-YR | GGTCCCTGATTTGGTCGTTA                             |                                                                                                     |
| Mo5-F  | <u>CCCCCGGGCTGCAGGAATTCCTGCGTAGTTTGTCTGAGC</u>   | Amplification of the upstream fragment (native promoter) of <i>MoATG5</i> gene                      |
| Mo5-R  | <u>CGGGATGGGAGAAGACATAGTTCTGGACCGGCC</u>         |                                                                                                     |
| Fg5-F  | ATGTCTTCTCCCATCCCGCA                             | Amplification of the full length ORF of <i>FgATG5</i> gene                                          |
| Fg5-R  | <u>GGTACCGGGCCCCCCTCGAGAAGATTCCAATTGCCAAGCG</u>  |                                                                                                     |
| MF5-YF | GGGGTCGCATGGGTGTTT                               | For identification of complemented transformants of $\Delta Moatg5$ mutants with <i>FgATG5</i> gene |
| MF5-YR | TCTGCTTGGCGTGTCC                                 |                                                                                                     |

---

76

77
